# Supplementary material for: Enhancement of thermoelectric performance in Cd-doped Ca3Co4O9via spin entropy, defect chemistry and phonon scattering
Source: Royal Society of Chemistry journal article supplement (doi:10.1039/c4ta03891f), 2014-10-01
Supplement: c4ta03891f1.pdf [file c4ta03891f1.pdf]

## Morphological properties

The SEM images of the fractured cross-sectional view of pure CCO,  $\text{Cd}_{x=0.5}$  and  $\text{Cd}_{x=0.02}$  are shown in Figure S1- a, b and c, respectively. In figure a, the inset shows a lamellar-like grain structure after SPS. For all the pure and Cd-doped specimens, the dense bulks with lamellar structure were observed. There was no obvious difference visible for lamellar grains of pure and Cd-doped specimens.

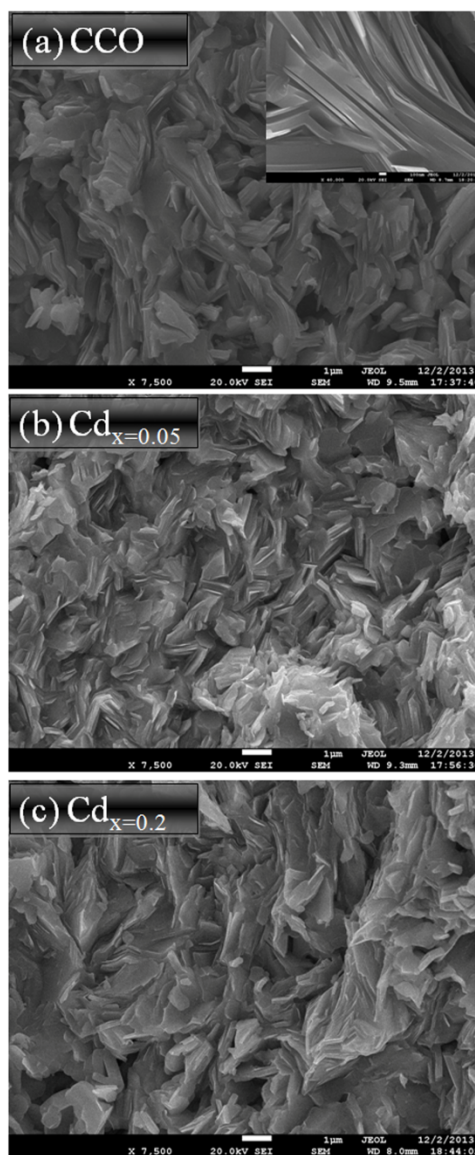

**Figure S1:** Typical SEM micrographs of pure and Cd-doped  $\text{Ca}_3\text{Co}_4\text{O}_9$  ceramics
